# Supplementary material
Source: publisher site journal article supplement (https://www.spandidos-publications.com/7774/downloadSupplementary)
Supplement: Supplementary file 1 [file downloadSupplementary]

**Table SI.** Primer sequences.

| <b>Transcript</b> | <b>Direction</b> | <b>Primer sequence (5'-3')</b> |
|-------------------|------------------|--------------------------------|
| lncRNA-ENO1-210   | F                | GGATGTCCGTCAGAACCCAT           |
|                   | R                | GCCATTAGCGCATCACAGTC           |
| lncRNA-SNHG1-266  | F                | TGCCTCCCAGGGTGAATACA           |
|                   | R                | CCCTTTGAGCCAAGCAGGTT           |
| lncRNA-SNHG15-203 | F                | TCTTGGCTGGCAGACCTGTA           |
|                   | R                | AGGATGGCGGTGGATGACTA           |
| lncRNA-VMP1-217   | F                | GTTTCACCGTGTAGCCAGG            |
|                   | R                | GGCAGCAAAGGTCCATAAGA           |
| lncRNA-H19-203    | F                | TCCGGACACAAAACCCCTCTA          |
|                   | R                | CTCCAGAGCCGATTCTCTGA           |
| CDKN1A            | F                | GGATGTCCGTCAGAACCCAT           |
|                   | R                | GCCATTAGCGCATCACAGTC           |
| H2AC7             | F                | CTCCCCAAGAAGACTGAGAG           |
|                   | R                | GCCTTTGTTAAGACTGCTTCCT         |
| SQSTM1            | F                | GGTGAAACACGGACACTTCG           |
|                   | R                | AGAAGCTGATTCTGCCGTGG           |
| H2AC20            | F                | GCGTTGTCTGTGTTTAACCTTG         |
|                   | R                | CACTCGCCCTACCGGGAA             |
| H2AC18            | F                | GCTCCCTAAGAAGACGGAGA           |
|                   | R                | GCCTTTTGAGTTCACAGGTGC          |
| GAPDH             | F                | GAAGGTGAAGGTCGGAGTCAA          |
|                   | R                | CTGGAAGATGGTGATGGGATTT         |

F, forward; R, reverse; lncRNA, long non-coding RNA; ENO1, enolase 1; SNHG, small nucleolar RNA host gene; VMP1, vacuole membrane protein 1; CDKN1A, cyclin dependent kinase inhibitor 1A; H2AC, H2A clustered histone; SQSTM1, sequestosome 1.

**Table SII.** siRNA sequences.

| siRNA transcript | Sequence (5'-3')      |                       |
|------------------|-----------------------|-----------------------|
|                  | Sense                 | Antisense             |
| 1                | GGGACUACGCGGUGACGUCTT | GACGUCACCGCGUAGUCCCTT |
| 2                | GUCUUCGGCAGUCUAGUCATT | UGACUAGACUGCCGAAGACTT |
| 3                | CCCUCCUUGAGUCUCAUGUTT | ACAUGAGACUCAAGGAGGGTT |
| 4                | AAGCCUUGGCACCUUAAUUTT | AAUUAAGGUGCCAAGGCUUTT |

siRNA, small interfering RNA.

**Table SIII.** Quantification of key long non-coding RNAs using transcripts per million in RNA-sequencing.

| <b>lncRNA</b> | <b>C1</b> | <b>C2</b> | <b>C3</b> | <b>T1</b> | <b>T2</b> | <b>T3</b> |
|---------------|-----------|-----------|-----------|-----------|-----------|-----------|
| ENO1-210      | 47.36     | 47.42     | 25.10     | 13.50     | 7.19      | 6.13      |
| SNHG1-266     | 84.62     | 105.19    | 68.31     | 5.88      | 9.80      | 5.06      |
| SNHG15-203    | 19.45     | 20.50     | 17.63     | 6.94      | 6.57      | 4.87      |
| VMP1-217      | 0.96      | 1.40      | 0.60      | 43.80     | 52.97     | 32.51     |

lncRNA, long non-coding RNA; ENO1, enolase 1; SNHG, small nucleolar RNA host gene; VMP1, vacuole membrane protein 1; C, control; T, treatment group.

**Table SIV.** mRNAs and their corresponding long non-coding RNAs.

| <b>mRNA</b>     | <b>mRNA name</b> | <b>lncRNA</b>   | <b>lncRNA name</b> |
|-----------------|------------------|-----------------|--------------------|
| ENSG00000161011 | SQSTM1           | ENST00000653192 | ENST00000653192    |
| ENSG00000161011 | SQSTM1           | MSTRG.15719.1   | MSTRG.15719.1      |
| ENSG00000124762 | CDKN1A           | MSTRG.15719.1   | MSTRG.15719.1      |
| ENSG00000124762 | CDKN1A           | MSTRG.22456.2   | MSTRG.22456.2      |
| ENSG00000124762 | CDKN1A           | ENST00000474223 | SAT1-206           |
| ENSG00000161011 | SQSTM1           | MSTRG.3858.2    | MSTRG.3858.2       |
| ENSG00000161011 | SQSTM1           | MSTRG.9155.30   | MSTRG.9155.30      |
| ENSG00000161011 | SQSTM1           | MSTRG.6195.3    | MSTRG.6195.3       |
| ENSG00000161011 | SQSTM1           | MSTRG.17360.1   | MSTRG.17360.1      |
| ENSG00000124762 | CDKN1A           | MSTRG.17360.1   | MSTRG.17360.1      |
| ENSG00000161011 | SQSTM1           | ENST00000571351 | TNFRSF12A-203      |
| ENSG00000124762 | CDKN1A           | ENST00000571351 | TNFRSF12A-203      |
| ENSG00000161011 | SQSTM1           | MSTRG.10767.1   | MSTRG.10767.1      |
| ENSG00000161011 | SQSTM1           | ENST00000617022 | DDB2-212           |
| ENSG00000124762 | CDKN1A           | ENST00000617022 | DDB2-212           |
| ENSG00000161011 | SQSTM1           | ENST00000614440 | ENST00000614440    |
| ENSG00000124762 | CDKN1A           | ENST00000614440 | ENST00000614440    |
| ENSG00000161011 | SQSTM1           | ENST00000487002 | FDPS-212           |
| ENSG00000161011 | SQSTM1           | MSTRG.22018.1   | MSTRG.22018.1      |
| ENSG00000161011 | SQSTM1           | ENST00000507004 | HMGCS1-203         |
| ENSG00000161011 | SQSTM1           | ENST00000711045 | PURPL-299          |
| ENSG00000124762 | CDKN1A           | ENST00000711045 | PURPL-299          |
| ENSG00000161011 | SQSTM1           | ENST00000698147 | STAT1-237          |
| ENSG00000124762 | CDKN1A           | ENST00000711025 | PURPL-280          |
| ENSG00000161011 | SQSTM1           | ENST00000379253 | SAT1-202           |
| ENSG00000124762 | CDKN1A           | ENST00000612309 | DDB2-206           |
| ENSG00000161011 | SQSTM1           | ENST00000592937 | GADD45B-206        |
| ENSG00000161011 | SQSTM1           | ENST00000668074 | LINC00963-257      |
| ENSG00000124762 | CDKN1A           | ENST00000668074 | LINC00963-257      |
| ENSG00000161011 | SQSTM1           | ENST00000574007 | P4HB-218           |
| ENSG00000124762 | CDKN1A           | MSTRG.10733.8   | MSTRG.10733.8      |
| ENSG00000161011 | SQSTM1           | MSTRG.6779.2    | MSTRG.6779.2       |
| ENSG00000161011 | SQSTM1           | MSTRG.12250.3   | MSTRG.12250.3      |
| ENSG00000124762 | CDKN1A           | MSTRG.12250.3   | MSTRG.12250.3      |
| ENSG00000124762 | CDKN1A           | ENST00000528854 | FRMD8-206          |
| ENSG00000161011 | SQSTM1           | ENST00000379251 | SAT1-201           |
| ENSG00000161011 | SQSTM1           | ENST00000607520 | ENST00000607520    |
| ENSG00000124762 | CDKN1A           | ENST00000607520 | ENST00000607520    |
| ENSG00000124762 | CDKN1A           | MSTRG.14597.10  | MSTRG.14597.10     |
| ENSG00000161011 | SQSTM1           | ENST00000466567 | P4HB-204           |
| ENSG00000161011 | SQSTM1           | MSTRG.10766.1   | MSTRG.10766.1      |
| ENSG00000161011 | SQSTM1           | ENST00000466342 | SQSTM1-206         |
| ENSG00000124762 | CDKN1A           | ENST00000466342 | SQSTM1-206         |
| ENSG00000161011 | SQSTM1           | ENST00000330048 | SLC6A10P-202       |
| ENSG00000124762 | CDKN1A           | ENST00000330048 | SLC6A10P-202       |
| ENSG00000161011 | SQSTM1           | MSTRG.20626.14  | MSTRG.20626.14     |
| ENSG00000124762 | CDKN1A           | MSTRG.20626.14  | MSTRG.20626.14     |
| ENSG00000161011 | SQSTM1           | ENST00000647580 | ENST00000647580    |
| ENSG00000124762 | CDKN1A           | ENST00000647580 | ENST00000647580    |
| ENSG00000124762 | CDKN1A           | MSTRG.22451.1   | MSTRG.22451.1      |
| ENSG00000161011 | SQSTM1           | ENST00000701343 | ENST00000701343    |
| ENSG00000161011 | SQSTM1           | ENST00000674361 | XACT-203           |
| ENSG00000124762 | CDKN1A           | ENST00000472045 | IRF1-209           |
| ENSG00000161011 | SQSTM1           | MSTRG.5005.1    | MSTRG.5005.1       |
| ENSG00000124762 | CDKN1A           | MSTRG.5005.1    | MSTRG.5005.1       |

|                 |        |                 |                 |
|-----------------|--------|-----------------|-----------------|
| ENSG00000161011 | SQSTM1 | ENST00000494998 | HMOX1-204       |
| ENSG00000124762 | CDKN1A | ENST00000494998 | HMOX1-204       |
| ENSG00000161011 | SQSTM1 | ENST00000482091 | IDI1-204        |
| ENSG00000161011 | SQSTM1 | ENST00000557927 | AEN-203         |
| ENSG00000124762 | CDKN1A | ENST00000584176 | GRIN2C-204      |
| ENSG00000161011 | SQSTM1 | ENST00000673638 | STAT1-213       |
| ENSG00000124762 | CDKN1A | ENST00000673638 | STAT1-213       |
| ENSG00000161011 | SQSTM1 | MSTRG.11847.2   | MSTRG.11847.2   |
| ENSG00000161011 | SQSTM1 | MSTRG.10769.5   | MSTRG.10769.5   |
| ENSG00000161011 | SQSTM1 | MSTRG.14956.1   | MSTRG.14956.1   |
| ENSG00000124762 | CDKN1A | ENST00000533138 | FTH1-209        |
| ENSG00000161011 | SQSTM1 | ENST00000527832 | EPS8L2-211      |
| ENSG00000161011 | SQSTM1 | ENST00000315707 | LINC00324-201   |
| ENSG00000161011 | SQSTM1 | ENST00000584610 | FASN-205        |
| ENSG00000124762 | CDKN1A | ENST00000586518 | H3-3B-203       |
| ENSG00000124762 | CDKN1A | MSTRG.7358.2    | MSTRG.7358.2    |
| ENSG00000161011 | SQSTM1 | ENST00000630918 | DBET-201        |
| ENSG00000124762 | CDKN1A | ENST00000630918 | DBET-201        |
| ENSG00000161011 | SQSTM1 | ENST00000688783 | PURPL-238       |
| ENSG00000124762 | CDKN1A | ENST00000688783 | PURPL-238       |
| ENSG00000124762 | CDKN1A | ENST00000597573 | PDE4C-210       |
| ENSG00000161011 | SQSTM1 | ENST00000531063 | HSPA8-214       |
| ENSG00000124762 | CDKN1A | ENST00000474814 | SNHG12-206      |
| ENSG00000161011 | SQSTM1 | ENST00000701757 | LINC-PINT-244   |
| ENSG00000124762 | CDKN1A | ENST00000504196 | PLK2-206        |
| ENSG00000161011 | SQSTM1 | ENST00000473880 | LRWD1-205       |
| ENSG00000124762 | CDKN1A | MSTRG.12946.1   | MSTRG.12946.1   |
| ENSG00000124762 | CDKN1A | ENST00000442114 | LINC03040-203   |
| ENSG00000124762 | CDKN1A | ENST00000461507 | FDPS-204        |
| ENSG00000161011 | SQSTM1 | ENST00000560723 | STARD5-205      |
| ENSG00000124762 | CDKN1A | ENST00000560723 | STARD5-205      |
| ENSG00000124762 | CDKN1A | ENST00000649629 | HSD17B7-210     |
| ENSG00000161011 | SQSTM1 | MSTRG.5444.1    | MSTRG.5444.1    |
| ENSG00000124762 | CDKN1A | MSTRG.5444.1    | MSTRG.5444.1    |
| ENSG00000161011 | SQSTM1 | ENST00000597360 | PDE4C-209       |
| ENSG00000124762 | CDKN1A | ENST00000597360 | PDE4C-209       |
| ENSG00000161011 | SQSTM1 | MSTRG.15216.1   | MSTRG.15216.1   |
| ENSG00000124762 | CDKN1A | MSTRG.23074.1   | MSTRG.23074.1   |
| ENSG00000124762 | CDKN1A | ENST00000534918 | SLC9A3-AS1-201  |
| ENSG00000124762 | CDKN1A | ENST00000481869 | HES4-203        |
| ENSG00000124762 | CDKN1A | ENST00000647856 | ENST00000647856 |
| ENSG00000124762 | CDKN1A | ENST00000593460 | ARRDC2-203      |
| ENSG00000161011 | SQSTM1 | ENST00000586372 | FAM98C-204      |
| ENSG00000161011 | SQSTM1 | MSTRG.18886.1   | MSTRG.18886.1   |
| ENSG00000161011 | SQSTM1 | ENST00000564068 | COMMD4-209      |
| ENSG00000161011 | SQSTM1 | MSTRG.12276.4   | MSTRG.12276.4   |
| ENSG00000161011 | SQSTM1 | ENST00000688818 | EIF2AK3-DT-203  |
| ENSG00000124762 | CDKN1A | ENST00000688818 | EIF2AK3-DT-203  |
| ENSG00000124762 | CDKN1A | ENST00000663097 | SNHG7-206       |
| ENSG00000124762 | CDKN1A | ENST00000494436 | MPV17-216       |
| ENSG00000161011 | SQSTM1 | ENST00000608651 | GAS6-DT-201     |
| ENSG00000161011 | SQSTM1 | ENST00000567555 | ALDOA-215       |
| ENSG00000124762 | CDKN1A | ENST00000691141 | ENST00000691141 |
| ENSG00000161011 | SQSTM1 | ENST00000533168 | CTSF-209        |
| ENSG00000124762 | CDKN1A | ENST00000656092 | SNHG5-230       |
| ENSG00000124762 | CDKN1A | ENST00000565928 | TSPY26P-202     |
| ENSG00000161011 | SQSTM1 | ENST00000466303 | WBPI-206        |
| ENSG00000124762 | CDKN1A | ENST00000466303 | WBPI-206        |

|                 |        |                 |                  |
|-----------------|--------|-----------------|------------------|
| ENSG00000161011 | SQSTM1 | ENST00000681448 | RIGI-210         |
| ENSG00000161011 | SQSTM1 | MSTRG.7576.2    | MSTRG.7576.2     |
| ENSG00000124762 | CDKN1A | MSTRG.7576.2    | MSTRG.7576.2     |
| ENSG00000124762 | CDKN1A | MSTRG.9098.1    | MSTRG.9098.1     |
| ENSG00000124762 | CDKN1A | ENST00000701106 | ENST00000701106  |
| ENSG00000161011 | SQSTM1 | MSTRG.20626.51  | MSTRG.20626.51   |
| ENSG00000124762 | CDKN1A | ENST0000069682  | TINF2-214        |
| ENSG00000124762 | CDKN1A | ENST00000586759 | GADD45B-203      |
| ENSG00000161011 | SQSTM1 | ENST00000545932 | ISCU-211         |
| ENSG00000124762 | CDKN1A | ENST00000468307 | INSIG1-205       |
| ENSG00000161011 | SQSTM1 | ENST00000698624 | CD79B-207        |
| ENSG00000161011 | SQSTM1 | MSTRG.15477.1   | MSTRG.15477.1    |
| ENSG00000124762 | CDKN1A | ENST00000471323 | ALKBH6-209       |
| ENSG00000124762 | CDKN1A | MSTRG.19289.2   | MSTRG.19289.2    |
| ENSG00000124762 | CDKN1A | ENST00000475367 | SPTAN1-206       |
| ENSG00000161011 | SQSTM1 | ENST00000469972 | RALGDS-208       |
| ENSG00000124762 | CDKN1A | ENST00000687336 | ENST00000687336  |
| ENSG00000161011 | SQSTM1 | ENST00000561334 | SNX22-207        |
| ENSG00000161011 | SQSTM1 | ENST00000462639 | SAT1-205         |
| ENSG00000124762 | CDKN1A | ENST00000462639 | SAT1-205         |
| ENSG00000124762 | CDKN1A | ENST00000703011 | CYTOR-239        |
| ENSG00000161011 | SQSTM1 | ENST00000521122 | PVT1-210         |
| ENSG00000161011 | SQSTM1 | ENST00000556705 | SRP54-AS1-204    |
| ENSG00000124762 | CDKN1A | ENST00000556705 | SRP54-AS1-204    |
| ENSG00000184260 | H2AC20 | ENST00000438482 | ENST00000438482  |
| ENSG00000184260 | H2AC20 | ENST00000507244 | STX18-AS1-203    |
| ENSG00000184260 | H2AC20 | ENST00000526890 | CARS1-212        |
| ENSG00000184260 | H2AC20 | ENST00000561110 | DNAJC17-211      |
| ENSG00000184260 | H2AC20 | ENST00000578968 | SNHG15-203       |
| ENSG00000184260 | H2AC20 | ENST00000609194 | LRRC8D-DT-201    |
| ENSG00000184260 | H2AC20 | ENST00000675486 | ENST00000675486  |
| ENSG00000184260 | H2AC20 | ENST00000681770 | VLDLR-229        |
| ENSG00000184260 | H2AC20 | ENST00000685242 | MYLK-AS1-210     |
| ENSG00000184260 | H2AC20 | ENST00000690193 | LINC00662-279    |
| ENSG00000184260 | H2AC20 | MSTRG.7008.104  | MSTRG.7008.104   |
| ENSG00000196866 | H2AC7  | ENST00000438482 | ENST00000438482  |
| ENSG00000196866 | H2AC7  | ENST00000525050 | PPP6R3-207       |
| ENSG00000196866 | H2AC7  | ENST00000526890 | CARS1-212        |
| ENSG00000196866 | H2AC7  | ENST00000551626 | SOCS2-AS1-204    |
| ENSG00000196866 | H2AC7  | ENST00000578968 | SNHG15-203       |
| ENSG00000196866 | H2AC7  | ENST00000675486 | ENST00000675486  |
| ENSG00000196866 | H2AC7  | ENST00000685242 | MYLK-AS1-210     |
| ENSG00000288825 | H2AC18 | ENST00000532581 | GRAMD1B-207      |
| ENSG00000288825 | H2AC18 | ENST00000643807 | CMAHP-214        |
| ENSG00000288825 | H2AC18 | ENST00000654183 | SNHG17-217       |
| ENSG00000288825 | H2AC18 | ENST00000657659 | LINC00662-230    |
| ENSG00000288825 | H2AC18 | ENST00000662585 | CEACAM16-AS1-205 |
| ENSG00000288825 | H2AC18 | ENST00000674368 | SORD-209         |
| ENSG00000288825 | H2AC18 | ENST00000687457 | MIR137HG-208     |
| ENSG00000288825 | H2AC18 | MSTRG.7008.104  | MSTRG.7008.104   |

lncRNA, long non-coding RNA.
